# Supplementary material for: mTORC2 and AMPK differentially regulate muscle triglyceride content via Perilipin 3
Source: PubMed Central journal article supplement (PMC5021677; doi:10.1016/j.molmet.2016.06.007), 2016-06-22
Supplement: mmc3.pdf [file mmc3.pdf]

# Figure S1

A

| Protein Description                        | Gene Symbol | Expression in Ric mKO | Adjusted P-value |
|--------------------------------------------|-------------|-----------------------|------------------|
| 3-ketoacyl-CoA thiolase, mitochondrial     | Acaa2       | +23%                  | 0.035            |
| Acyl-CoA dehydrogenase family member 10/12 | Acad10/12   | +24%                  | 0.035            |
| Perilipin-3                                | Plin3       | +85%                  | 0.001            |
| ATP-citrate synthase                       | Acly        | +30%                  | 0.082            |

C

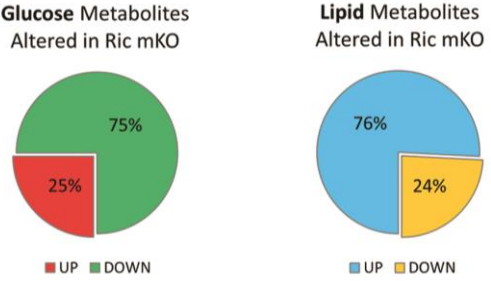

B

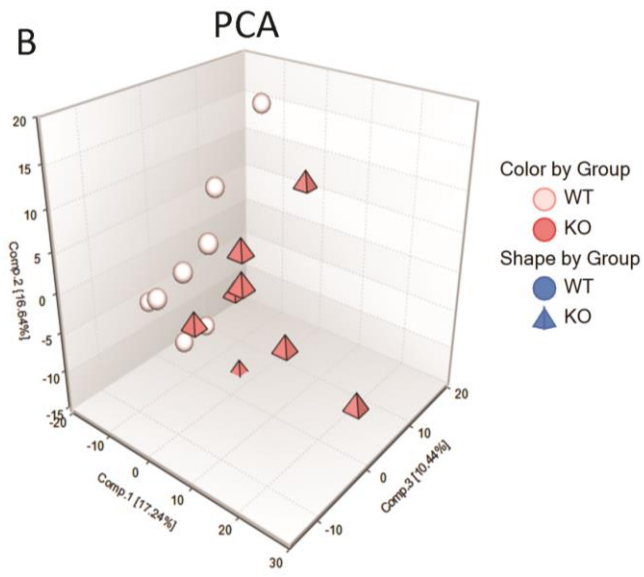

D

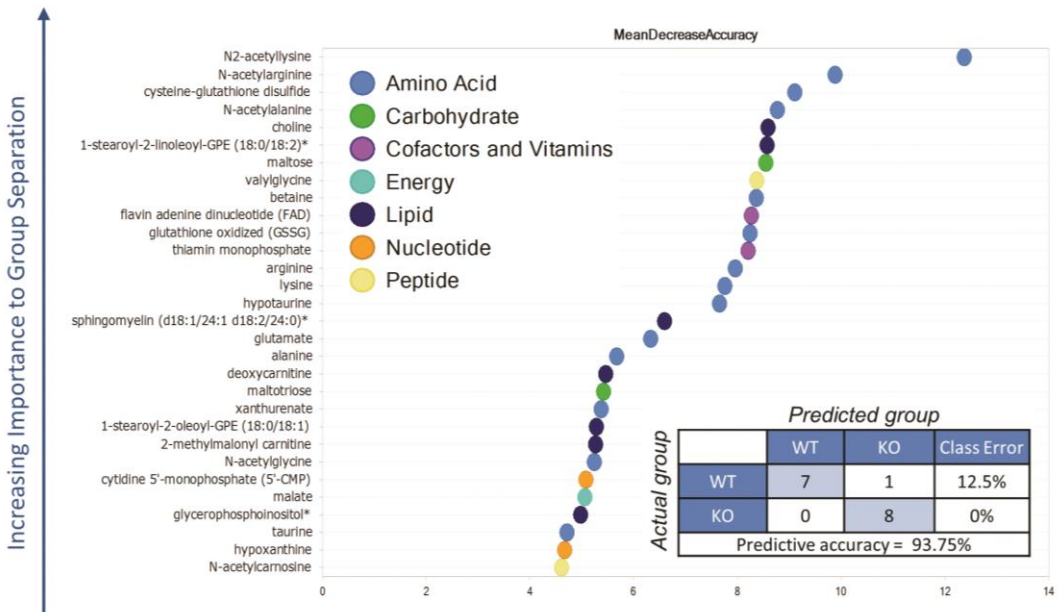

**Figure S1 related to Figure 1: (A)** Lipid metabolism proteins that were differentially expressed in Ric WT vs Ric mKO muscle as identified in the proteome analysis by MS. **(B)** Principal component analysis of the metabolome revealed a distinct separation between Ric WT and Ric mKO muscles suggesting that mTORC2-deficient muscle possess a unique biochemical signature. **(C)** Directional changes of glucose and lipid metabolites that were altered based on  $p < 0.1$  as identified by the metabolomic screen. **(D)** Random forest analysis (a supervised classification technique based on an ensemble of decision trees) resulted in a predictive accuracy of 93.75% (shown in the inset table). A value of 93.75% is greater than one would expect by random chance alone (50%), suggesting that these metabolites may be of interest as candidate biomarkers associated with mTORC2 expression. Listed are the top 30 metabolites based on their importance in separating the two groups.

# Figure S2

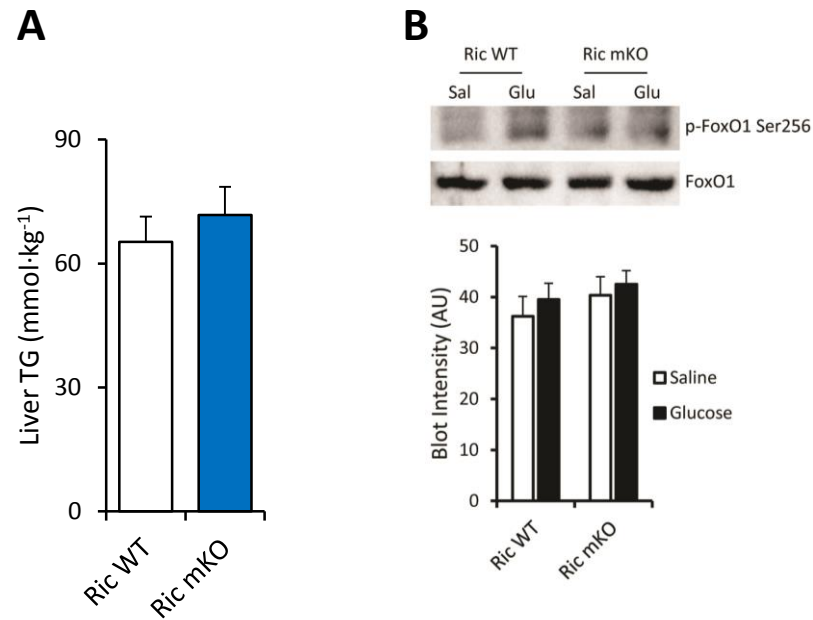

**Figure S2 related to Figure 1 and 2:** (A) Liver triglyceride levels (n = 6-8). (B) Representative blot and quantification of p-FoxO1 Ser256 in quadriceps muscle lysate from Ric WT and Ric mKO mice that had been injected with saline or glucose (n = 8-9). FoxO1 total serves as loading control.

**Figure S3**

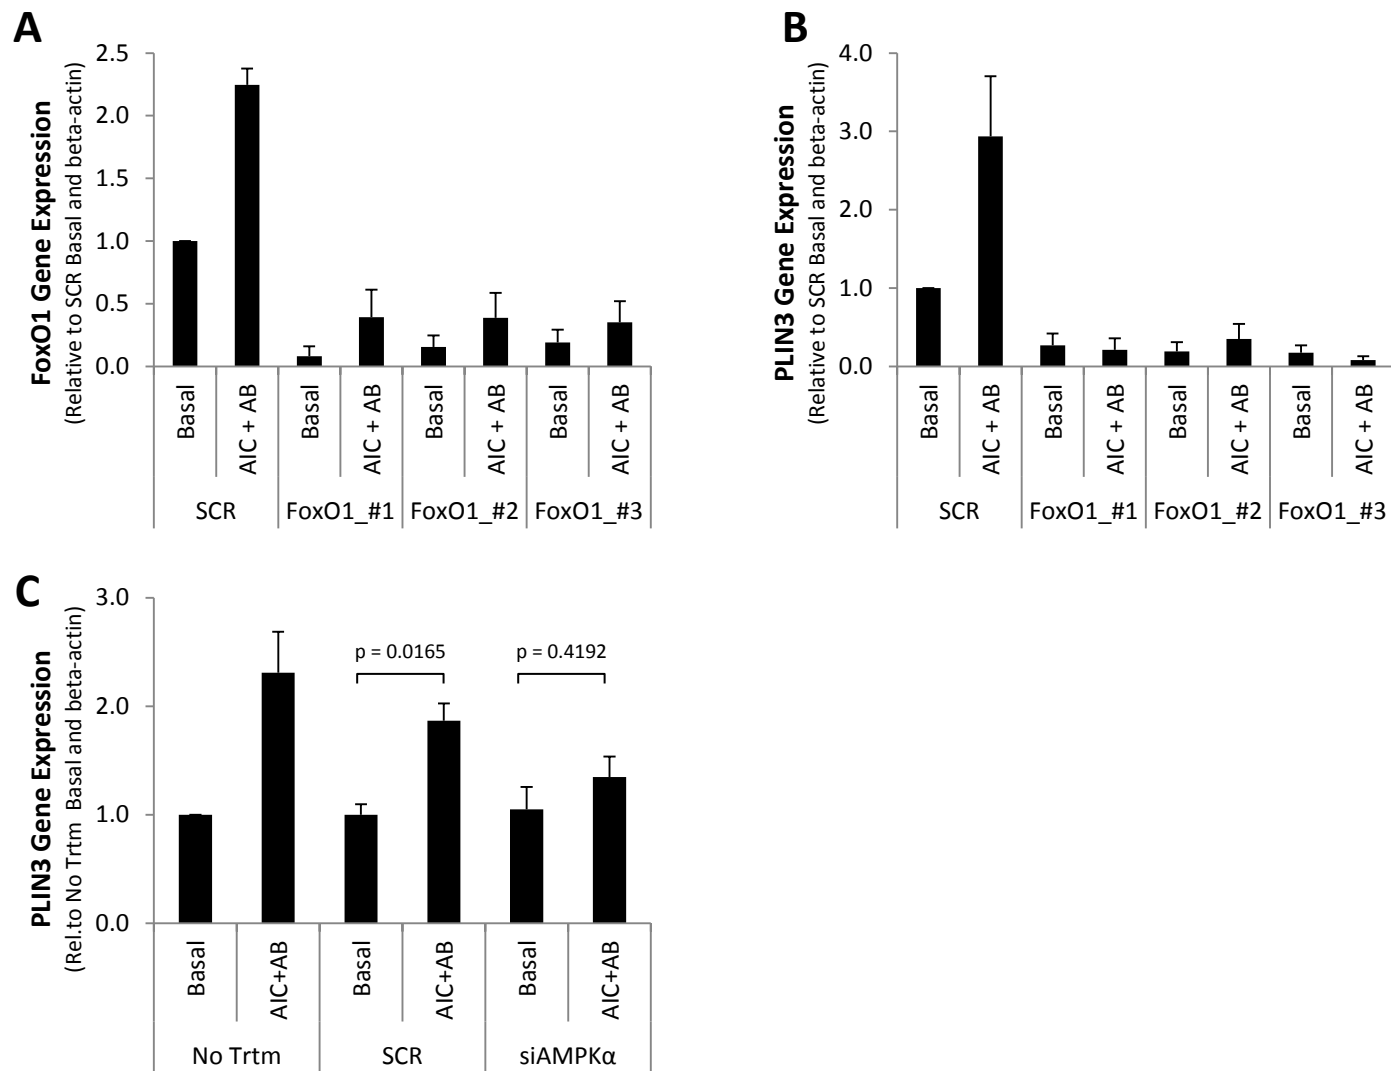

**Figure S3 related to Figure 5: (A,B)** The effect of FoxO1 knockdown using individual FoxO1 (FoxO1 (1), FoxO1 (2), FoxO1 (3)) siRNA sequences (methods online) on gene expression of FoxO1 and PLIN3 under control (Ctr) conditions and in response to AMPK activation by AICAR (AIC) plus A769662 (AB) (n = 3) as described in methods online. **(C)** The effect of AMPK $\alpha$  knockdown on PLIN3 expression following AMPK activation by AICAR (AIC) plus A769662 (AB).

Table S1

| ACC#     | Protein Description                                                | Gene Symbol | Ric mKO<br>Ric WT |
|----------|--------------------------------------------------------------------|-------------|-------------------|
| Q62087   | Serum paraoxonase/lactonase 3                                      | Pon3        | -101%             |
| Q9J1ME5  | AP-3 complex subunit beta-2                                        | Ap3b2       | -63%              |
| Q9Z0J4   | Nitric oxide synthase                                              |             |                   |
| Q9Z0J4-2 | N-NOS-2 Nitric oxide synthase                                      |             |                   |
| Q9Z0J4-3 | NNOS beta Nitric oxide synthase                                    | Nos1        | -50%              |
| Q9Z0J4-4 | NNOS gamma Nitric oxide synthase                                   |             |                   |
| Q9Z0J4-5 | NNOS mu Nitric oxide synthase                                      |             |                   |
| O08689   | Growth/differentiation factor 8                                    | Mstn        | -47%              |
| P55012   | Solute carrier family 12 member 2                                  | Slc12a2     | -31%              |
| Q8R1G2   | Carboxymethylenebutenolidase homolog                               | Cmb1        | -29%              |
| P82350   | Alpha-sarcoglycan                                                  | Sgca        | -29%              |
| Q9QUH0   | Glutaredoxin-1                                                     | GlrX        | -28%              |
| D3Z7P3   | Glutaminase kidney Iso                                             |             |                   |
| D3Z7P3-2 | Iso 2 Glutaminase kidney Iso                                       | Gls         | -25%              |
| P29758   | Ornithine aminotransferase                                         | Oat         | -22%              |
| Q9DAV9   | Trimeric intracellular cation channel type B                       | Tmem38b     | -22%              |
| Q91YW3   | DnaJ homolog subfamily C member 3                                  | Dnajc3      | -22%              |
| Q05BC3   | Echinoderm microtubule-associated protein-like 1                   |             |                   |
| Q05BC3-2 | Iso 2 Echinoderm microtubule-associated protein-like 1             | Eml1        | -19%              |
| Q05BC3-3 | Iso 3 Echinoderm microtubule-associated protein-like 1             |             |                   |
| Q9DB05   | Alpha-soluble NSF attachment protein                               | Napa        | 18%               |
| Q6VGS5   | Protein Daple                                                      |             |                   |
| Q6VGS5-2 | Iso 2 Protein Daple                                                | Ccdc88c     | 19%               |
| Q9JJZ3   | SH3 and multiple ankyrin repeat domains protein 3                  | Shank3      |                   |
| Q8R164   | Valacyclovir hydrolase                                             | Bphl        | 22%               |
| Q61362   | Chitinase-3-like protein 1                                         | Chi3l1      |                   |
| Q8BWT1   | 3-ketoacyl-CoA thiolase mitochondrial                              | Acaa2       | 23%               |
| Q8K370   | Acyl-CoA dehydrogenase family member 10                            | Acad10      |                   |
| D3Z2B3   | Acyl-CoA dehydrogenase family member 12                            | Acad12      | 24%               |
| P15105   | Glutamine synthetase                                               | Glu1        | 26%               |
| Q5NBX1   | Protein cordon-bleu                                                |             |                   |
| Q5NBX1-2 | Iso 2 Protein cordon-bleu                                          | Cobl        | 37%               |
| Q5NBX1-3 | Iso 3 Protein cordon-bleu                                          |             |                   |
| Q5NBX1-4 | Iso 4 Protein cordon-bleu                                          |             |                   |
| Q3KNY0   | Ig-like and fibronectin type III domain-containing protein 1       |             |                   |
| Q3KNY0-2 | Iso 2 Ig-like and fibronectin type III domain-containing protein 1 | Igfn1       | 37%               |
| Q3KNY0-3 | Iso 3 Ig-like and fibronectin type III domain-containing protein 1 |             |                   |
| Q3KNY0-4 | Iso 4 Ig-like and fibronectin type III domain-containing protein 1 |             |                   |
| Q9QXY6   | EH domain-containing protein 3                                     | Ehd3        | 45%               |
| Q9EQP2   | EH domain-containing protein 4                                     | Ehd4        |                   |
| Q3KNY0   | Ig-like and fibronectin type III domain-containing protein 1       | Igfn1       | 49%               |
| P17563   | Selenium-binding protein 1                                         | Selenbp1    | 53%               |
| P16015   | Carbonic anhydrase 3                                               | Ca3         | 62%               |
| Q9ERT9   | Protein phosphatase 1 regulatory subunit 1A                        | Ppp1r1a     | 65%               |
| P09541   | Myosin light chain 4                                               | Myl4        | 72%               |
| Q9DBG5   | Perilipin-3                                                        | Plin3       | 85%               |

**Table S1:** Protein groups differentially expressed in Ric mKO muscle compared to Ric WT muscle (adjusted P value < 0.05) (n = 8). Gray bars on the left encompass the protein groups that shared peptide sequences identified and quantified by unbiased MS-based proteomics.

# Table S2

| Biochemical Name                         | KEGG                   | HMDB                      | PubChem  | Ric mKO / Ric WT | Super Pathway          | Sub Pathway                                          |
|------------------------------------------|------------------------|---------------------------|----------|------------------|------------------------|------------------------------------------------------|
| ergothioneine                            | <a href="#">C05570</a> | <a href="#">HMDB03045</a> | 3032311  | 10.45            | Xenobiotics            | Food Component/Plant                                 |
| galactose 1-phosphate                    | <a href="#">C00446</a> | <a href="#">HMDB00645</a> | 123912   | 2.66             | Carbohydrate           | Fructose, Mannose and Galactose Metabolism           |
| S-lactoylglutathione                     | <a href="#">C03451</a> | <a href="#">HMDB01066</a> | 440018   | 2.47             | Amino Acid             | Glutathione Metabolism                               |
| riboflavin (Vitamin B2)                  | <a href="#">C00255</a> | <a href="#">HMDB00244</a> | 493570   | 2.02             | Cofactors and Vitamins | Riboflavin Metabolism                                |
| phosphopantetheine                       | <a href="#">C01134</a> | <a href="#">HMDB01416</a> | 987      | 1.98             | Cofactors and Vitamins | Pantothenate and CoA Metabolism                      |
| xanthosine                               | <a href="#">C01762</a> | <a href="#">HMDB00299</a> | 64959    | 1.88             | Nucleotide             | Purine Metabolism, (Hypo)Xanthine/Inosine containing |
| cysteine-glutathione disulfide           | --                     | <a href="#">HMDB00656</a> | 4247235  | 1.84             | Amino Acid             | Glutathione Metabolism                               |
| thiamin diphosphate                      | <a href="#">C00068</a> | <a href="#">HMDB01372</a> | 1132     | 1.75             | Cofactors and Vitamins | Thiamine Metabolism                                  |
| 1-stearoyl-2-oleoyl-GPE (18:0/18:1)      | --                     | --                        | --       | 1.69             | Lipid                  | Phospholipid Metabolism                              |
| gamma-glutamylglutamate                  | <a href="#">C05262</a> | <a href="#">HMDB11737</a> | 92865    | 1.66             | Peptide                | Gamma-glutamyl Amino Acid                            |
| leucylglycine                            | --                     | --                        | 79070    | 1.62             | Peptide                | Dipeptide                                            |
| acetyl CoA                               | <a href="#">C00024</a> | <a href="#">HMDB01206</a> | 444493   | 1.55             | Lipid                  | Fatty Acid Metabolism                                |
| hypotaurine                              | <a href="#">C00519</a> | <a href="#">HMDB00965</a> | 107812   | 1.54             | Amino Acid             | Methionine, Cysteine, SAM and Taurine Metabolism     |
| choline                                  | <a href="#">C00114</a> | <a href="#">HMDB00097</a> | 305      | 1.53             | Lipid                  | Phospholipid Metabolism                              |
| valylglycine                             | --                     | --                        | 136487   | 1.52             | Peptide                | Dipeptide                                            |
| 1-palmitoyl-GPI (16:0)*                  | --                     | <a href="#">HMDB61695</a> | --       | 1.49             | Lipid                  | Lysolipid                                            |
| AICA ribonucleotide                      | <a href="#">C04677</a> | <a href="#">HMDB01517</a> | 65110    | 1.48             | Nucleotide             | Purine Metabolism, (Hypo)Xanthine/Inosine containing |
| 1-docosahexaenoylglycerol (22:6)         | --                     | <a href="#">HMDB11587</a> | --       | 1.44             | Lipid                  | Monooxyglycerol                                      |
| N-acetylglycine                          | --                     | <a href="#">HMDB00632</a> | 10972    | 1.42             | Amino Acid             | Glycine, Serine and Threonine Metabolism             |
| 1-palmitoyl-2-oleoyl-GPE (16:0/18:1)     | --                     | <a href="#">HMDB05320</a> | 5283496  | 1.42             | Lipid                  | Phospholipid Metabolism                              |
| 1-palmitoyl-2-linoleoyl-GPE (16:0/18:2)  | --                     | <a href="#">HMDB05322</a> | 9546747  | 1.42             | Lipid                  | Phospholipid Metabolism                              |
| 1-stearoyl-2-linoleoyl-GPE (18:0/18:2)*  | --                     | --                        | 9546749  | 1.41             | Lipid                  | Phospholipid Metabolism                              |
| spermidine                               | <a href="#">C00315</a> | <a href="#">HMDB01257</a> | 1102     | 1.40             | Amino Acid             | Polyamine Metabolism                                 |
| gamma-glutamylphenylalanine              | --                     | <a href="#">HMDB00594</a> | 111299   | 1.38             | Peptide                | Gamma-glutamyl Amino Acid                            |
| 2-methylmalonyl carnitine                | --                     | <a href="#">HMDB13133</a> | 53481628 | 1.38             | Lipid                  | Fatty Acid Synthesis                                 |
| hydroxybutyrylcarnitine*                 | --                     | <a href="#">HMDB13127</a> | 53481617 | 1.38             | Lipid                  | Fatty Acid Metabolism(Acyl Carnitine)                |
| glycerophosphoinositol*                  | --                     | --                        | --       | 1.38             | Lipid                  | Phospholipid Metabolism                              |
| squalene                                 | <a href="#">C00751</a> | <a href="#">HMDB00256</a> | 638072   | 1.35             | Lipid                  | Sterol                                               |
| ethanolamine                             | <a href="#">C00169</a> | <a href="#">HMDB00149</a> | 700      | 1.32             | Lipid                  | Phospholipid Metabolism                              |
| adenosine 3',5'-diphosphate              | <a href="#">C00054</a> | <a href="#">HMDB00061</a> | 159296   | 1.32             | Nucleotide             | Purine Metabolism, Adenine containing                |
| N-acetylalanine                          | <a href="#">C02847</a> | <a href="#">HMDB00766</a> | 88064    | 1.30             | Amino Acid             | Alanine and Aspartate Metabolism                     |
| thiamin monophosphate                    | <a href="#">C01081</a> | <a href="#">HMDB02666</a> | 3382778  | 1.30             | Cofactors and Vitamins | Thiamine Metabolism                                  |
| glutathione, oxidized (GSSG)             | <a href="#">C00127</a> | <a href="#">HMDB03337</a> | 65359    | 1.29             | Amino Acid             | Glutathione Metabolism                               |
| suberate (octanedioate)                  | <a href="#">C08278</a> | <a href="#">HMDB00893</a> | 10457    | 1.29             | Lipid                  | Fatty Acid, Dicarboxylate                            |
| flavin adenine dinucleotide (FAD)        | <a href="#">C00016</a> | <a href="#">HMDB01248</a> | 643975   | 1.28             | Cofactors and Vitamins | Riboflavin Metabolism                                |
| xanthine                                 | <a href="#">C00385</a> | <a href="#">HMDB00292</a> | 1188     | 1.25             | Nucleotide             | Purine Metabolism, (Hypo)Xanthine/Inosine containing |
| flavin mononucleotide (FMN)              | <a href="#">C00061</a> | <a href="#">HMDB01520</a> | 710      | 1.25             | Cofactors and Vitamins | Riboflavin Metabolism                                |
| hypoxanthine                             | <a href="#">C00262</a> | <a href="#">HMDB00157</a> | 790      | 1.24             | Nucleotide             | Purine Metabolism, (Hypo)Xanthine/Inosine containing |
| pyridoxal phosphate                      | <a href="#">C00018</a> | <a href="#">HMDB01491</a> | 1051     | 1.24             | Cofactors and Vitamins | Vitamin B6 Metabolism                                |
| glutamate                                | <a href="#">C00025</a> | <a href="#">HMDB00148</a> | 611      | 1.23             | Amino Acid             | Glutamate Metabolism                                 |
| arachidonate (20:4n6)                    | <a href="#">C00219</a> | <a href="#">HMDB01043</a> | 444899   | 1.23             | Lipid                  | Polyunsaturated Fatty Acid (n3 and n6)               |
| betaine                                  | <a href="#">C00719</a> | <a href="#">HMDB00043</a> | 247      | 1.22             | Amino Acid             | Glycine, Serine and Threonine Metabolism             |
| 1-palmitoyl-2-linoleoyl-GPC (16:0/18:2)* | --                     | --                        | 5287971  | 1.21             | Lipid                  | Phospholipid Metabolism                              |
| malate                                   | <a href="#">C00149</a> | <a href="#">HMDB00156</a> | 525      | 1.20             | Energy                 | TCA Cycle                                            |
| cytidine 5'-monophosphate (5'-CMP)       | <a href="#">C00055</a> | <a href="#">HMDB00095</a> | 6131     | 1.17             | Nucleotide             | Pyrimidine Metabolism, Cytidine containing           |
| 1-stearoyl-2-oleoyl-GPS (18:0/18:1)      | --                     | --                        | 9547087  | 1.15             | Lipid                  | Phosphatidylserine (PS)                              |
| sphingomyelin (d18:1/24:1, d18:2/24:0)*  | --                     | --                        | --       | 1.15             | Lipid                  | Sphingolipid Metabolism                              |
| arabonate/xyloenate                      | --                     | --                        | --       | 1.14             | Carbohydrate           | Pentose Phosphate Pathway                            |
| 1-stearoyl-2-linoleoyl-GFC (18:0/18:2)*  | --                     | --                        | --       | 1.14             | Lipid                  | Phospholipid Metabolism                              |
| guanosine 5'- monophosphate (5'-GMP)     | <a href="#">C00144</a> | <a href="#">HMDB01397</a> | 6804     | 1.14             | Nucleotide             | Purine Metabolism, Guanine containing                |
| kyurenine                                | <a href="#">C00328</a> | <a href="#">HMDB00684</a> | 161166   | 1.11             | Amino Acid             | Tryptophan Metabolism                                |
| creatine                                 | <a href="#">C00791</a> | <a href="#">HMDB00562</a> | 568      | 1.11             | Amino Acid             | Creatine Metabolism                                  |
| phosphate                                | <a href="#">C00009</a> | <a href="#">HMDB01429</a> | 1061     | 1.07             | Energy                 | Oxidative Phosphorylation                            |
| creatine                                 | <a href="#">C00300</a> | <a href="#">HMDB00064</a> | 586      | 1.05             | Amino Acid             | Creatine Metabolism                                  |
| taurine                                  | <a href="#">C00245</a> | <a href="#">HMDB00251</a> | 1123     | 1.03             | Amino Acid             | Methionine, Cysteine, SAM and Taurine Metabolism     |

**Table S2:** Metabolites that were increased ( $p < 0.05$ ) in Ric mKO compared to Ric WT muscle ( $n = 8$ ).

# Table S3

| Biochemical Name                | KEGG                   | HMDB                       | PubChem          | Ric mKO / Ric WT | Super Pathway | Sub Pathway                                      |
|---------------------------------|------------------------|----------------------------|------------------|------------------|---------------|--------------------------------------------------|
| 1,2-dipalmitoyl-GPC (16:0/16:0) | --                     | <a href="#">HMDB00564</a>  | 452110           | 0.93             | Lipid         | Phospholipid Metabolism                          |
| pipecolate                      | <a href="#">C00408</a> | <a href="#">HMDB00070</a>  | 849              | 0.92             | Amino Acid    | Lysine Metabolism                                |
| alanine                         | <a href="#">C00041</a> | <a href="#">HMDB00161</a>  | 5950             | 0.90             | Amino Acid    | Alanine and Aspartate Metabolism                 |
| anserine                        | <a href="#">C01262</a> | <a href="#">HMDB00194</a>  | 112072           | 0.89             | Peptide       | Dipeptide Derivative                             |
| N-acetylneuraminic acid         | <a href="#">C00270</a> | <a href="#">HMDB00230</a>  | 439197           | 0.87             | Carbohydrate  | Aminosugar Metabolism                            |
| methionine sulfoxide            | <a href="#">C02989</a> | <a href="#">HMDB02005</a>  | 156980           | 0.86             | Amino Acid    | Methionine, Cysteine, SAM and Taurine Metabolism |
| aspartate                       | <a href="#">C00386</a> | <a href="#">HMDB00033</a>  | 439224           | 0.85             | Peptide       | Dipeptide Derivative                             |
| N-methylproline                 | <a href="#">C00049</a> | <a href="#">HMDB00191</a>  | 5960             | 0.84             | Amino Acid    | Alanine and Aspartate Metabolism                 |
| N-methylproline                 | --                     | --                         | 557              | 0.83             | Amino Acid    | Urea cycle, Arginine and Proline Metabolism      |
| 4-guanidinobutanoate            | <a href="#">C01035</a> | <a href="#">HMDB03464</a>  | 500              | 0.80             | Amino Acid    | Guanidino and Acetamido Metabolism               |
| deoxycarnitine                  | <a href="#">C01181</a> | <a href="#">HMDB01161</a>  | 134              | 0.80             | Lipid         | Carnitine Metabolism                             |
| N6, N6-trimethyllysine          | <a href="#">C03173</a> | <a href="#">HMDB01325</a>  | 440120           | 0.77             | Amino Acid    | Lysine Metabolism                                |
| arginine                        | <a href="#">C00062</a> | <a href="#">HMDB000517</a> | 232              | 0.76             | Amino Acid    | Urea cycle, Arginine and Proline Metabolism      |
| galactitol (dulcitol)           | <a href="#">C01697</a> | <a href="#">HMDB00107</a>  | 11850            | 0.76             | Carbohydrate  | Fructose, Mannose and Galactose Metabolism       |
| betaine aldehyde                | <a href="#">C00576</a> | <a href="#">HMDB01262</a>  | 249              | 0.75             | Amino Acid    | Glycine, Serine and Threonine Metabolism         |
| maltotetraose                   | <a href="#">C02052</a> | <a href="#">HMDB01296</a>  | 446495           | 0.74             | Carbohydrate  | Glycogen Metabolism                              |
| lysine                          | <a href="#">C00047</a> | <a href="#">HMDB00182</a>  | 5962             | 0.73             | Amino Acid    | Lysine Metabolism                                |
| xanthurenate                    | <a href="#">C02470</a> | <a href="#">HMDB000881</a> | 5699             | 0.70             | Amino Acid    | Tryptophan Metabolism                            |
| N-acetylcarnosine               | --                     | <a href="#">HMDB12881</a>  | 9903482          | 0.70             | Peptide       | Dipeptide Derivative                             |
| UDP-glucose                     | <a href="#">C00029</a> | <a href="#">HMDB00286</a>  | 8629             | 0.70             | Carbohydrate  | Nucleotide Sugar                                 |
| sorbitol                        | <a href="#">C00794</a> | <a href="#">HMDB00247</a>  | 5780             | 0.68             | Carbohydrate  | Fructose, Mannose and Galactose Metabolism       |
| N-acetylarginine                | <a href="#">C02562</a> | <a href="#">HMDB04620</a>  | 67427            | 0.63             | Amino Acid    | Urea cycle, Arginine and Proline Metabolism      |
| maltotriose                     | <a href="#">C01835</a> | <a href="#">HMDB01262</a>  | 439586           | 0.62             | Carbohydrate  | Glycogen Metabolism                              |
| oleoylcarnitine                 | --                     | <a href="#">HMDB05065</a>  | 6441392;53477789 | 0.60             | Lipid         | Fatty Acid Metabolism(Acyl Carnitine)            |
| maltose                         | <a href="#">C00208</a> | <a href="#">HMDB00163</a>  | 10991489         | 0.54             | Carbohydrate  | Glycogen Metabolism                              |
| N6-carboxymethyllysine          | --                     | --                         | --               | 0.52             | Carbohydrate  | Advanced Glycation End-product                   |
| linoleoylcarnitine*             | --                     | <a href="#">HMDB06469</a>  | 6450015          | 0.52             | Lipid         | Fatty Acid Metabolism(Acyl Carnitine)            |
| N2-acetyllysine                 | <a href="#">C12989</a> | <a href="#">HMDB00446</a>  | 92907            | 0.38             | Amino Acid    | Lysine Metabolism                                |

**Table S3:** Metabolites that were decreased ( $p < 0.05$ ) in Ric mKO compared to Ric WT muscle ( $n = 8$ ).
